# Supplementary material for: Mindfulness Meditation Adherence in a College Sample: Comparison of a 10-Min Versus 20-Min 2-Week Daily Practice
Source: Springer Nature journal article supplement (doi:10.1007/s12671-017-0717-y), 2017-03-28
Supplement: MOESM1 [file 12181096]

**Supplementary Materials**

Supplemental Table 1

Hierarchical Regression Analysis Examining the Relations of Baseline Depression Symptoms, Meditation Adherence, and Meditation Dose to Post-Experimental Depression Symptoms

| Variable | *B* | *SE B* | β | *sri2* | | *F* | *R2* (∆R2) |
| --- | --- | --- | --- | --- | --- | --- | --- |
| Step 1 | | | | | | 59.55** | .443 (.443) |
| Intercept | 1.221 | 0.621 |  |  | |  |  |
| Baseline Depression Symptoms | 0.705 | 0.091 | 0.665 | .665** | |  |  |
| Step 2 | | | | | | 20.39** | .456 (.013) |
| Intercept | 1.920 | 0.911 |  | |  |  |  |
| Baseline Depression Symptoms | 0.688 | 0.093 | 0.649 | | .640** |  |  |
| Meditation Adherence | -0.189 | 0.145 | -0.160 | | -.113 |  |  |
| Meditation Dose | 0.382 | 0.520 | 0.090 | | .063 |  |  |
| *Note.* SE = Standard error; *sri2* = semipartial correlations. Depression symptoms assessed with the Depression Anxiety Stress Scales - 21. Meditation adherence = total number of days meditation was practiced. Meditation dose = total hours of meditation reported.  ** p* < .05. ** *p* < .001. | | | | | | | |
