# Supplementary material for: Mindfulness Meditation Adherence in a College Sample: Comparison of a 10-Min Versus 20-Min 2-Week Daily Practice
Source: Springer Nature journal article supplement (doi:10.1007/s12671-017-0717-y), 2017-03-28
Supplement: MOESM2 [file 12181096]

**Supplementary Materials**

Supplemental Table 2

Hierarchical Regression Analysis Examining the Relations of Baseline Anxiety Symptoms, Meditation Adherence, and Meditation Dose to Post-Experimental Anxiety Symptoms

| Variable | *B* | *SE B* | β | *sri2* | | *F* | *R2* (∆R2) |
| --- | --- | --- | --- | --- | --- | --- | --- |
| Step 1 | | | | | | 27.88** | .271 (.271) |
| Intercept | 2.075 | 0.589 |  |  | |  |  |
| Baseline Anxiety Symptoms | 0.519 | 0.098 | 0.521 | .521** | |  |  |
| Step 2 | | | | | | 11.02** | .312 (.041) |
| Intercept | 2.389 | 0.864 |  | |  |  |  |
| Baseline Anxiety Symptoms | 0.514 | 0.097 | 0.516 | | .515** |  |  |
| Meditation Adherence | -0.280 | 0.144 | -0.263 | | -.189 |  |  |
| Meditation Dose | 0.982 | 0.520 | 0.256 | | .183 |  |  |
| *Note.* SE = Standard error; *sri2* = semipartial correlations. Anxiety symptoms assessed with the Depression Anxiety Stress Scales - 21. Meditation adherence = total number of days meditation was practiced. Meditation dose = total hours of meditation reported.  ** p* < .05. ** *p* < .001. | | | | | | | |

Supplemental Table 3

Hierarchical Regression Analysis Examining the Relations of Baseline Stress Symptoms, Meditation Adherence, and Meditation Dose to Post-Experimental Stress Symptoms

| Variable | *B* | *SE B* | β | *sri2* | | *F* | *R2* (∆R2) |
| --- | --- | --- | --- | --- | --- | --- | --- |
| Step 1 | | | | | | 46.09** | .381 (.381) |
| Intercept | 1.183 | 0.838 |  |  | |  |  |
| Baseline Stress Symptoms | 0.668 | 0.098 | 0.617 | .617** | |  |  |
| Step 2 | | | | | | 15.66** | .391 (.011) |
| Intercept | 0.887 | 1.122 |  | |  |  |  |
| Baseline Stress Symptoms | 0.657 | 0.100 | 0.607 | | .600** |  |  |
| Meditation Adherence | -0.081 | 0.152 | -0.069 | | -.049 |  |  |
| Meditation Dose | 0.596 | 0.546 | 0.140 | | .100 |  |  |
| *Note.* SE = Standard error; *sri2* = semipartial correlations. Stress symptoms assessed with the Depression Anxiety Stress Scales - 21. Meditation adherence = total number of days meditation was practiced. Meditation dose = total hours of meditation reported.  ** p* < .05. ** *p* < .001. | | | | | | | |

Supplemental Table 4

Hierarchical Regression Analysis Examining the Relations of Baseline Mindful Awareness, Meditation Adherence, and Meditation Dose to Post-Experimental Mindful Awareness

| Variable | *B* | *SE B* | β | *sri2* | | *F* | *R2* (∆R2) |
| --- | --- | --- | --- | --- | --- | --- | --- |
| Step 1 | | | | | | 41.43** | .350 (.350) |
| Intercept | 1.318 | 0.434 |  |  | |  |  |
| Baseline Mindful Awareness | 0.729 | 0.113 | 0.591 | .591** | |  |  |
| Step 2 | | | | | | 14.94** | .374 (.024) |
| Intercept | 1.357 | 0.453 |  | |  |  |  |
| Baseline Mindful Awareness | 0.741 | 0.113 | 0.601 | | .599** |  |  |
| Meditation Adherence | -0.057 | 0.035 | -0.209 | | -.149 |  |  |
| Meditation Dose | 0.187 | 0.126 | 0.189 | | .135 |  |  |
| *Note.* SE = Standard error; *sri2* = semipartial correlations. Mindful Awareness assessed with the Mindful Attention Awareness Scale. Meditation adherence = total number of days meditation was practiced. Meditation dose = total hours of meditation reported.  ** p* < .05. ** *p* < .001. | | | | | | | |

Supplemental Table 5

Hierarchical Regression Analysis Examining the Relations of Baseline Mindful Experience, Meditation Adherence, and Meditation Dose to Post-Experimental Mindful Experience

| Variable | *B* | *SE B* | β | *sri2* | | *F* | *R2* (∆R2) |
| --- | --- | --- | --- | --- | --- | --- | --- |
| Step 1 | | | | | | 13.00** | .143 (.143) |
| Intercept | 20.738 | 4.781 |  |  | |  |  |
| Baseline Mindful Experience | 0.479 | 0.133 | 0.378 | .378** | |  |  |
| Step 2 | | | | | | 4.76* | .158 (.015) |
| Intercept | 20.378 | 4.841 |  | |  |  |  |
| Baseline Mindful Experience | 0.446 | 0.137 | 0.352 | | .344* |  |  |
| Meditation Adherence | 0.252 | 0.294 | 0.128 | | .090 |  |  |
| Meditation Dose | -0.022 | 1.041 | -0.003 | | -.002 |  |  |
| *Note.* SE = Standard error; *sri2* = semipartial correlations. Mindful experience assessed with the Freiburg Mindfulness Inventory. Meditation adherence = total number of days meditation was practiced. Meditation dose = total hours of meditation reported.  ** p* < .05. ** *p* < .01. | | | | | | | |

Supplemental Table 6

Hierarchical Regression Analysis Examining the Relations of Baseline Self-Compassion, Meditation Adherence, and Meditation Dose to Post-Experimental Self-Compassion

| Variable | *B* | *SE B* | β | *sri2* | *F* | *R2* (∆R2) |
| --- | --- | --- | --- | --- | --- | --- |
| Step 1 | | | | | 56.97** | .428 (.428) |
| Intercept | 1.463 | 0.244 |  |  |  |  |
| Baseline Self-Compassion | 0.614 | 0.081 | 0.655 | .655** |  |  |
| Step 2 | | | | | 18.55** | .429 (.001) |
| Intercept | 1.444 | 0.254 |  |  |  |  |
| Baseline Self-Compassion | 0.611 | 0.084 | 0.652 | .642** |  |  |
| Meditation Adherence | 0.001 | 0.020 | 0.004 | .003 |  |  |
| Meditation Dose | 0.015 | 0.073 | 0.026 | .019 |  |  |
| *Note.* SE = Standard error; *sri2* = semipartial correlations. Self-compassion assessed with the Self-Compassion Scale. Meditation adherence = total number of days meditation was practiced. Meditation dose = total hours of meditation reported.  ** p* < .05. ** *p* < .001. | | | | | | |
