# Supplementary material for: Mindfulness Meditation Adherence in a College Sample: Comparison of a 10-Min Versus 20-Min 2-Week Daily Practice
Source: Springer Nature journal article supplement (doi:10.1007/s12671-017-0717-y), 2017-03-28
Supplement: MOESM6 [file 12181096]

**Supplementary Materials**

Supplemental Table 6

Hierarchical Regression Analysis Examining the Relations of Baseline Self-Compassion, Meditation Adherence, and Meditation Dose to Post-Experimental Self-Compassion

| Variable | *B* | *SE B* | β | *sri2* | *F* | *R2* (∆R2) |
| --- | --- | --- | --- | --- | --- | --- |
| Step 1 | | | | | 56.97** | .428 (.428) |
| Intercept | 1.463 | 0.244 |  |  |  |  |
| Baseline Self-Compassion | 0.614 | 0.081 | 0.655 | .655** |  |  |
| Step 2 | | | | | 18.55** | .429 (.001) |
| Intercept | 1.444 | 0.254 |  |  |  |  |
| Baseline Self-Compassion | 0.611 | 0.084 | 0.652 | .642** |  |  |
| Meditation Adherence | 0.001 | 0.020 | 0.004 | .003 |  |  |
| Meditation Dose | 0.015 | 0.073 | 0.026 | .019 |  |  |
| *Note.* SE = Standard error; *sri2* = semipartial correlations. Self-compassion assessed with the Self-Compassion Scale. Meditation adherence = total number of days meditation was practiced. Meditation dose = total hours of meditation reported.  ** p* < .05. ** *p* < .001. | | | | | | |
